# Supplementary material for: Association between COVID-19 Vaccination and SARS-CoV-2 Infection among Household Contacts of Infected Individuals: A Prospective Household Study in England
Source: MDPI journal article supplement (doi:10.3390/vaccines12020113), 2024-01-23
Supplement: s1 [file s1]

## Supplementary Materials

### *Sensitivity analysis stratified by variant period*

In the stratified analysis by study period, we categorized the vaccination status of the household contacts in a manner that reflects the vaccination policy during each period. During the Alpha wave, most individuals received one dose of a COVID-19 vaccine and only a few received two doses. During the Delta wave, booster vaccination was introduced, therefore vaccination status was classified similarly to the main analysis. During the Omicron wave, most individuals were vaccinated with two doses (mostly >90 days), or three doses; accordingly, they were classified as vaccinated with three doses  $\geq$  eight days (i.e. protected), or else (including unvaccinated, vaccinated with two doses (regardless of time elapsed since vaccination) or three doses  $\leq$  seven days).

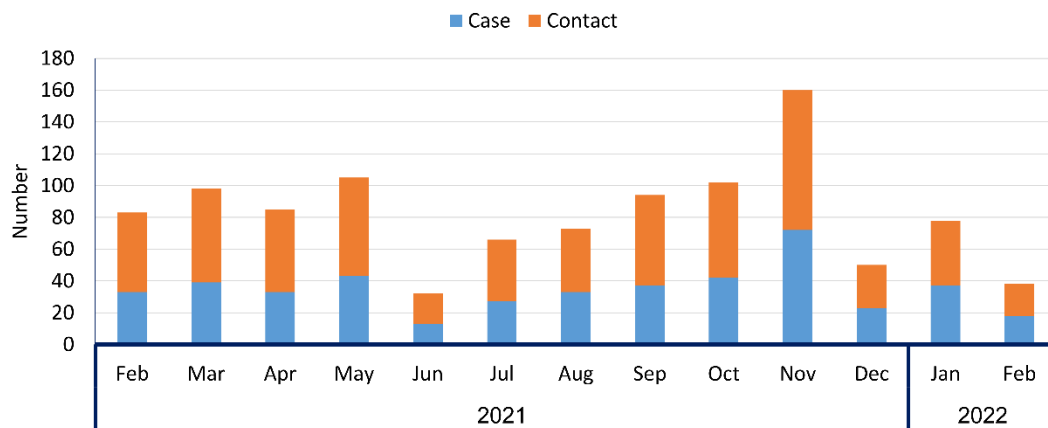

The enrollment date was determined based on the date of the interview

**Supplementary Figure S1.** Enrollment of index cases and contacts by month/year: COVID-19 household study.

**Supplementary Table S1.** Characteristics of individuals who were included and those who were excluded from the study.

| Characteristic                                | Included in the study | Excluded from the study |
|-----------------------------------------------|-----------------------|-------------------------|
| Total                                         | 1064                  | 154                     |
| Status                                        |                       |                         |
| Index case                                    | 450 (42.3%)           | 63 (40.9%)              |
| Household contact                             | 614 (57.7%)           | 92 (59.1%)              |
| Sex                                           |                       |                         |
| Male                                          | 497 (46.7%)           | 69 (44.8%)              |
| Female                                        | 567 (53.3%)           | 85 (55.2%)              |
| Age groups, years                             |                       |                         |
| 1-4                                           | 16 (1.5%)             | 5 (3.2%)                |
| 5-15                                          | 91 (8.6%)             | 21 (13.6%)              |
| 16-19                                         | 34 (3.2%)             | 8 (5.2%)                |
| 20-29                                         | 99 (9.3%)             | 17 (11.0%)              |
| 30-39                                         | 140 (13.2%)           | 26 (16.9%)              |
| 40-49                                         | 223 (21.0%)           | 28 (18.2%)              |
| 50-59                                         | 280 (26.3%)           | 23 (14.9%)              |
| 60-87                                         | 180 (16.9%)           | 26 (16.9%)              |
| Ethnicity                                     |                       |                         |
| White                                         | 977 (91.9%)           | 140 (90.9%)             |
| Other                                         | 88 (8.1%)             | 14 (9.1%)               |
| Household size                                |                       |                         |
| 2-3 individuals                               | 585 (55.1%)           | 82 (53.2%)              |
| 4-8 individuals                               | 477 (44.9%)           | 72 (46.8%)              |
| Variant/period                                |                       |                         |
| Alpha (week 6-18, 2021)                       | 299 (28.1%)           | 52 (33.8%)              |
| Delta (weeks 19-48, 2021)                     | 607 (57.0%)           | 90 (58.4%)              |
| Omicron (weeks 49-52 2021/weeks 1-6, 2022)    | 158 (14.8%)           | 12 (7.8%)               |
| COVID-19 vaccination (age ≥20 years) (n=1042) | 922                   | 120                     |
| Not vaccinated                                | 162 (17.6%)           | 32 (26.7%)              |
| 1 dose                                        | 167 (18.1%)           | 17 (14.2%)              |
| 2 doses                                       | 419 (45.4%)           | 67 (55.8%)              |
| 3 doses                                       | 174 (18.9%)           | 4 (3.3%)                |

**Supplementary Table S2.** Symptoms among the index cases and SARS-CoV-2 RT-PCR positive household contacts aged 20 years or older.

|                                      | <b>Index cases</b> | <b>Positive household contacts</b> |
|--------------------------------------|--------------------|------------------------------------|
| Total                                | 450                | 238                                |
| Fever                                | 241 (53.6%)        | 120 (50.4%)                        |
| Cough                                | 334 (74.2%)        | 169 (71.0%)                        |
| Loss of smell/taste                  | 227 (50.4%)        | 118 (49.6%)                        |
| Other symptoms                       | 420 (93.3%)        | 227 (95.4%)                        |
| Fever, cough, or loss of smell/taste | 390 (86.7%)        | 200 (84.0%)                        |
| Any symptom                          | 427 (94.9%)        | 229 (96.2%)                        |
| Number of symptoms                   |                    |                                    |
| 0                                    | 23 (5.1%)          | 9 (3.8%)                           |
| 1                                    | 44 (9.8%)          | 31 (13.0%)                         |
| 2                                    | 110 (24.4%)        | 57 (23.9%)                         |
| 3                                    | 134 (29.8%)        | 75 (31.5%)                         |
| ≥4                                   | 139 (30.9%)        | 66 (27.7%)                         |

**Supplementary Table S3.** COVID-19 vaccination status by demographic factors among all household contacts.

|                                            | Household contacts, N=614 |            |             |                      |
|--------------------------------------------|---------------------------|------------|-------------|----------------------|
|                                            | Not vaccinated            | 1 dose     | 2 doses     | 3 doses <sup>a</sup> |
| Total                                      | 211                       | 95         | 227         | 81                   |
| Age groups, years <sup>b</sup>             |                           |            |             |                      |
| 1-4                                        | 16 (7.6%)                 | 0 (0.0%)   | 0 (0.0%)    | 0 (0.0%)             |
| 5-15                                       | 85 (40.3%)                | 4 (4.2%)   | 2 (0.9%)    | 0 (0.0%)             |
| 16-19                                      | 17 (8.1%)                 | 9 (9.5%)   | 8 (3.5%)    | 0 (0.0%)             |
| 20-29                                      | 28 (13.3%)                | 19 (20.0%) | 22 (9.7%)   | 2 (2.5%)             |
| 30-39                                      | 29 (13.7%)                | 6 (6.3%)   | 23 (10.2%)  | 13 (16.0%)           |
| 40-49                                      | 16 (7.6%)                 | 14 (14.7%) | 60 (26.5%)  | 14 (17.3%)           |
| 50-59                                      | 12 (5.7%)                 | 29 (30.5%) | 62 (27.4%)  | 30 (37.0%)           |
| 60-87                                      | 8 (3.8%)                  | 14 (14.7%) | 49 (21.7%)  | 22 (27.2%)           |
| Sex                                        |                           |            |             |                      |
| Male                                       | 118 (55.9%)               | 45 (47.4%) | 112 (49.3%) | 46 (56.8%)           |
| Female                                     | 93 (44.1%)                | 50 (52.6%) | 115 (50.7%) | 35 (43.2%)           |
| Ethnicity                                  |                           |            |             |                      |
| White                                      | 186 (88.2%)               | 85 (90.4%) | 209 (92.1%) | 78 (96.3%)           |
| Other                                      | 25 (11.8%)                | 9 (9.6%)   | 18 (7.9%)   | 3 (3.7%)             |
| Household size                             |                           |            |             |                      |
| 2-3 individuals                            | 59 (28.0%)                | 57 (60.0%) | 137 (60.6%) | 56 (69.1%)           |
| 4-8 individuals                            | 152 (72.0%)               | 38 (40.0%) | 89 (39.4%)  | 25 (30.9%)           |
| Period                                     |                           |            |             |                      |
| Alpha (week 6-18, 2021)                    | 110 (52.1%)               | 63 (66.3%) | 9 (4.0%)    | 0 (0.0%)             |
| Delta (weeks 19-48, 2021)                  | 91 (43.1%)                | 31 (32.6%) | 194 (85.5%) | 32 (39.5%)           |
| Omicron (weeks 49-52 2021/weeks 1-6, 2022) | 10 (4.7%)                 | 1 (1.1%)   | 24 (10.5%)  | 49 (60.5%)           |

<sup>a</sup> One person who received 4 doses was included in the 3 doses group. <sup>b</sup> Information on age was missing for 1 person.

**Supplementary Table S4.** COVID-19 vaccination status among the index cases and their household contacts aged 20 years or older.

|                                    | <b>Index cases</b> | <b>Household contacts</b> |
|------------------------------------|--------------------|---------------------------|
| Total                              | 450                | 472                       |
| Not vaccinated                     | 69 (15.3%)         | 93 (19.7%)                |
| 1 dose                             | 85 (18.9%)         | 82 (17.4%)                |
| 2 doses                            | 202 (44.9%)        | 217 (46.0%)               |
| 3 doses                            | 94 (20.9%)         | 80 (16.9%)                |
| 1 dose ChAdOx1-S                   | 42 (9.3%)          | 49 (10.4%)                |
| 1 dose mRNA vaccine                | 43 (9.6%)          | 33 (7.0%)                 |
| 2 doses ChAdOx1-S                  | 141 (31.3%)        | 137 (29.0%)               |
| 2 doses mRNA vaccine               | 61 (13.6%)         | 80 (16.9%)                |
| 3 doses mRNA vaccine               | 49 (10.9%)         | 45 (9.5%)                 |
| 3 doses (2 ChAdOx1-S booster mRNA) | 45 (10.0%)         | 33 (7.0%)                 |
| Other                              | 0 (0.0%)           | 2 (0.4%)                  |
| 1 doses≤21 days                    | 13 (2.9%)          | 12 (2.5%)                 |
| 1 dose>21 days                     | 72 (16.0%)         | 69 (14.6%)                |
| 2 doses≤7 days                     | 11 (2.4%)          | 3 (0.6%)                  |
| 2 doses 8-90 days                  | 73 (16.3%)         | 74 (15.7%)                |
| 2 doses>90 days                    | 118 (26.3%)        | 140 (29.7%)               |
| 3 doses≤7 days                     | 15 (3.3%)          | 4 (0.8%)                  |
| 3 doses 8-151 days                 | 78 (17.4%)         | 76 (16.1%)                |

ChAdOx1-S: the adenovirus vector vaccine (Oxford-AstraZeneca) COVID-19 vaccine, mRNA vaccine: either mRNA-1273 (Moderna, Inc.) or BNT162b2 (Pfizer-BioNTech) vaccines.

**Supplementary Table S5. A:** SARS-CoV-2 RT-PCR positivity in at least one follow-up nasal swab among the index cases by demographics and COVID-19 vaccination status.

|                                                   | Overall | Any positive nasal PCR | Unadjusted RR (95% CI) <sup>a</sup> | P value | Adjusted RR (95% CI) <sup>a</sup> | P value      |
|---------------------------------------------------|---------|------------------------|-------------------------------------|---------|-----------------------------------|--------------|
|                                                   | 450     | 398 (88.4%)            |                                     |         |                                   |              |
| <b>Age group</b>                                  |         |                        |                                     | 0.735   |                                   | 0.732        |
| 20-29                                             | 28      | 25 (89.3%)             | 1.00                                |         | 1.00                              |              |
| 30-39                                             | 69      | 64 (92.8%)             | 1.01 (0.90-1.14)                    | 0.793   | 1.03 (0.91-1.18)                  | 0.571        |
| 40-49                                             | 119     | 104 (87.4%)            | 0.98 (0.86-1.10)                    | 0.768   | 1.01 (0.88-1.15)                  | 0.846        |
| 50-59                                             | 147     | 127 (86.4%)            | 0.95 (0.84-1.08)                    | 0.493   | 0.97 (0.86-1.11)                  | 0.735        |
| 60-87                                             | 87      | 78 (89.7%)             | 0.98 (0.87-1.11)                    | 0.835   | 1.01 (0.88-1.16)                  | 0.840        |
| <b>Sex</b>                                        |         |                        |                                     | 0.045   |                                   | 0.064        |
| Male                                              | 176     | 164 (93.2%)            | 1.00                                |         | 1.00                              |              |
| Female                                            | 274     | 234 (85.4%)            | 0.94 (0.89-0.99)                    |         | 0.94 (0.89-1.00)                  |              |
| <b>Household size</b>                             |         |                        |                                     | 0.140   |                                   | 0.979        |
| 2-3 individuals                                   | 276     | 243 (88.0%)            | 1.00                                |         | 1.00                              |              |
| 4-8 individuals                                   | 173     | 154 (89.0%)            | 1.01 (0.95-1.07)                    |         | 0.99 (0.92-1.07)                  |              |
| <b>Period</b>                                     |         |                        |                                     | 0.769   |                                   | 0.295        |
| Alpha (weeks 6-18, 2021)                          | 117     | 100 (85.5%)            | 1.00                                |         | 1.00                              |              |
| Delta (weeks 19-48, 2021)                         | 259     | 231 (89.2%)            | 1.02 (0.95-1.10)                    | 0.470   | 1.11 (0.96-1.29)                  | 0.130        |
| Omicron (weeks 49-52 2021 & 1-6, 2022)            | 74      | 67 (90.5%)             | 1.02 (0.92-1.13)                    | 0.646   | 1.03 (0.93-1.15)                  | 0.475        |
| <b>COVID-19 vaccination of the case</b>           |         |                        |                                     | 0.041   |                                   | 0.060        |
| Not vaccinated                                    | 69      | 64 (92.8%)             | 1.00                                |         | 1.00                              |              |
| 1 dose                                            | 85      | 74 (87.1%)             | 0.96 (0.86-1.06)                    | 0.424   | 0.97 (0.86-1.10)                  | 0.714        |
| 2 doses                                           | 202     | 184 (91.1%)            | 1.02 (0.94-1.10)                    | 0.569   | 1.00 (0.92-1.10)                  | 0.850        |
| 3 doses                                           | 94      | 76 (80.9%)             | 0.89 (0.79-1.00)                    | 0.052   | <b>0.84 (0.73-0.98)</b>           | <b>0.027</b> |
| <b>COVID-19 vaccination x Brand (index cases)</b> |         |                        |                                     | 0.114   |                                   | 0.083        |
| Not vaccinated                                    | 69      | 64 (92.8%)             | 1.00                                |         | 1.00                              |              |
| 1 dose ChAdOx1-S                                  | 42      | 40 (95.2%)             | 1.02 (0.93-1.12)                    | 0.583   | 1.04 (0.93-1.17)                  | 0.405        |
| 1 dose mRNA vaccine                               | 43      | 34 (79.1%)             | 0.88 (0.76-1.04)                    | 0.144   | 0.90 (0.76-1.07)                  | 0.257        |
| 2 doses ChAdOx1-S                                 | 141     | 133 (94.3%)            | 1.02 (0.94-1.10)                    | 0.545   | 1.01 (0.92-1.11)                  | 0.716        |
| 2 doses mRNA vaccine                              | 61      | 51 (83.6%)             | 1.01 (0.92-1.11)                    | 0.742   | 1.00 (0.90-1.12)                  | 0.905        |
| 3 doses mRNA vaccine                              | 49      | 40 (81.6%)             | 0.91 (0.79-1.04)                    | 0.194   | 0.87 (0.74-1.03)                  | 0.115        |
| 3 doses (2 ChAdOx1-S, booster mRNA)               | 45      | 36 (80.0%)             | 0.86 (0.73-1.02)                    | 0.091   | <b>0.82 (0.68-0.99)</b>           | <b>0.047</b> |
| <b>COVID-19 vaccination x time (index cases)</b>  | N=449   |                        |                                     | 0.508   |                                   | 0.082        |
| Not vaccinated, vaccinated 1 dose ≤21 days        | 82      | 76 (92.7%)             | 1.00                                |         | 1.00                              |              |
| Vaccinated 1 dose >21 days or 2 doses ≤7 days     | 83      | 72 (86.7%)             | 0.93 (0.84-1.04)                    | 0.211   | 0.96 (0.86-1.07)                  | 0.480        |
| Vaccinated 2 doses 8-90 days                      | 73      | 64 (87.7%)             | 0.94 (0.85-1.05)                    | 0.301   | 0.90 (0.79-1.03)                  | 0.139        |
| Vaccinated 2 doses >90 days or 3 doses ≤7 days    | 133     | 119 (89.5%)            | 0.96 (0.88-1.05)                    | 0.412   | 0.90 (0.81-1.00)                  | 0.072        |
| Vaccinated 3 doses 8-151 days                     | 78      | 66 (84.6%)             | 0.91 (0.81-1.02)                    | 0.113   | <b>0.83 (0.71-0.96)</b>           | <b>0.017</b> |

<sup>a</sup> Generalized Estimating Equations using negative binomial models yielding relative risk (RR), 95% confidence intervals (CI) and P values. The variables that were included in the models were: vaccination status of the case, age, sex, household size, and period, as indicated in the table. The results of the covariates relate to the model in which COVID-19 vaccination status was introduced as the number of doses. The results for the covariates in the remaining models related to 'vaccine brand' and number of doses by time elapsed since vaccination' were similar and thus not presented. ChAdOx1-S: the adenovirus vector vaccine (Oxford-AstraZeneca) COVID-19 vaccine, mRNA vaccine: either mRNA-1273 (Moderna, Inc.) or BNT162b2 (Pfizer-BioNTech) vaccines.

**Supplementary Table S5. B:** SARS-CoV-2 positivity in the follow-up nasal RT-PCR swabs among the index cases by demographics and COVID-19 vaccination status<sup>a</sup>.

|                                            | Overall            | Nasal PCR swab 1 | P value | Nasal PCR swab 2 <sup>a</sup> | P value | Nasal PCR swab 3 <sup>a</sup> | P value | All PCRs positives <sup>a</sup> | P value | All PCRs negatives <sup>a</sup> | P value |
|--------------------------------------------|--------------------|------------------|---------|-------------------------------|---------|-------------------------------|---------|---------------------------------|---------|---------------------------------|---------|
|                                            |                    | N=450            |         | N=439                         |         | N=420                         |         | N=420                           |         | N=420                           |         |
| <b>Overall</b>                             | 450                | 391 (86.9%)      |         | 327 (74.5%)                   |         | 181 (43.1%)                   |         | 174 (41.4%)                     |         | 44 (10.5%)                      |         |
| <b>Age group</b>                           |                    |                  | 0.958   |                               | 0.667   |                               | 0.012   |                                 | 0.017   |                                 | 0.365   |
| 20-29                                      | 28                 | 24 (85.7%)       |         | 21 (84.0%)                    |         | 10 (52.6%)                    |         | 10 (52.6%)                      |         | 1 (5.3%)                        |         |
| 30-39                                      | 69                 | 62 (89.9%)       |         | 48 (75.0%)                    |         | 31 (51.7%)                    |         | 30 (50.0%)                      |         | 3 (5.0%)                        |         |
| 40-49                                      | 119                | 103 (86.6%)      |         | 85 (72.0%)                    |         | 38 (32.8%)                    |         | 37 (31.9%)                      |         | 14 (12.1%)                      |         |
| 50-59                                      | 147                | 127 (86.4%)      |         | 106 (72.6%)                   |         | 57 (39.9%)                    |         | 54 (37.8%)                      |         | 19 (13.3%)                      |         |
| 60-87                                      | 87                 | 75 (86.2%)       |         | 67 (77.9%)                    |         | 45 (54.9%)                    |         | 43 (52.4%)                      |         | 7 (8.5%)                        |         |
| <b>Sex</b>                                 |                    |                  | 0.146   |                               | 0.227   |                               | 0.016   |                                 | 0.031   |                                 | 0.007   |
| Male                                       | 176                | 158 (89.8%)      |         | 132 (77.6%)                   |         | 83 (50.3%)                    |         | 79 (47.9%)                      |         | 9 (5.5%)                        |         |
| Female                                     | 274                | 233 (85.0%)      |         | 195 (72.5%)                   |         | 98 (38.4%)                    |         | 95 (37.3%)                      |         | 35 (13.7%)                      |         |
| <b>Household size</b>                      |                    |                  | 0.619   |                               | 0.423   |                               | 0.064   |                                 | 0.064   |                                 | 0.949   |
| 2-3 individuals                            | 276                | 239 (86.2%)      |         | 206 (75.7%)                   |         | 121 (46.7%)                   |         | 121 (46.7%)                     |         | 27 (10.4%)                      |         |
| 4-8 individuals                            | 173                | 152 (87.9%)      |         | 120 (72.3%)                   |         | 60 (37.5%)                    |         | 60 (37.5%)                      |         | 17 (10.6%)                      |         |
| <b>Period</b>                              |                    |                  | 0.269   |                               | 0.353   |                               | 0.419   |                                 | 0.368   |                                 | 0.280   |
| Alpha (week 6-18, 2021)                    | 117                | 97 (82.9%)       |         | 90 (78.9%)                    |         | 50 (45.0%)                    |         | 50 (45.0%)                      |         | 15 (13.5%)                      |         |
| Delta (weeks 19-48, 2021)                  | 259                | 227 (87.6%)      |         | 183 (72.0%)                   |         | 107 (42.4%)                   |         | 101 (41.7%)                     |         | 25 (10.3%)                      |         |
| Omicron (weeks 49-52 2021/weeks 1-6, 2022) | 74                 | 67 (90.5%)       |         | 54 (76.1%)                    |         | 24 (35.8%)                    |         | 23 (34.3%)                      |         | 4 (6.0%)                        |         |
| <b>COVID-19 vaccination</b>                |                    |                  | 0.046   |                               | 0.007   |                               | 0.070   |                                 | 0.033   |                                 | 0.063   |
| Not vaccinated                             | 69                 | 63 (91.3%)       |         | 59 (88.1%)                    |         | 35 (57.4%)                    |         | 35 (57.4%)                      |         | 4 (6.6%)                        |         |
| 1 dose                                     | 85                 | 71 (83.5%)       |         | 65 (80.2%)                    |         | 32 (41.0%)                    |         | 32 (41.0%)                      |         | 8 (10.3%)                       |         |
| 2 doses                                    | 202                | 182 (90.1%)      |         | 141 (71.2%)                   |         | 82 (42.7%)                    |         | 77 (40.1%)                      |         | 16 (8.3%)                       |         |
| 3 doses                                    | 94                 | 75 (79.8%)       |         | 62 (66.7%)                    |         | 32 (36.0%)                    |         | 30 (33.7%)                      |         | 16 (18.0%)                      |         |
| <b>COVID-19 vaccination x Brand</b>        |                    |                  | 0.004   |                               | 0.011   |                               | 0.198   |                                 | 0.046   |                                 | 0.022   |
| Not vaccinated                             | 69                 | 63 (91.3%)       |         | 59 (88.1%)                    |         | 35 (57.4%)                    |         | 35 (57.4%)                      |         | 4 (6.6%)                        |         |
| 1 dose ChAdOx1-S                           | 42                 | 38 (90.5%)       |         | 33 (82.5%)                    |         | 17 (43.6%)                    |         | 17 (43.6%)                      |         | 2 (5.1%)                        |         |
| 1 dose mRNA vaccine                        | 43                 | 33 (76.7%)       |         | 32 (78.0%)                    |         | 15 (38.5%)                    |         | 15 (38.5%)                      |         | 6 (15.4%)                       |         |
| 2 doses ChAdOx1-S                          | 141                | 133 (94.3%)      |         | 106 (75.2%)                   |         | 62 (45.3%)                    |         | 61 (44.5%)                      |         | 7 (5.1%)                        |         |
| 2 doses mRNA vaccine                       | 61                 | 49 (80.3%)       |         | 35 (61.4%)                    |         | 20 (36.4%)                    |         | 16 (29.1%)                      |         | 9 (16.4%)                       |         |
| 3 doses mRNA vaccine                       | 49                 | 40 (81.6%)       |         | 31 (64.6%)                    |         | 17 (37.0%)                    |         | 16 (34.8%)                      |         | 8 (17.4%)                       |         |
| 3 doses (2 ChAdOx1-S booster mRNA)         | 45                 | 35 (77.8%)       |         | 31 (68.9%)                    |         | 15 (34.9%)                    |         | 14 (32.6%)                      |         | 8 (18.6%)                       |         |
| <b>COVID-19 vaccination x time</b>         | N=449 <sup>b</sup> |                  | 0.004   | N=438 <sup>c</sup>            | 0.003   | N=419 <sup>c</sup>            | 0.062   | N=419 <sup>c</sup>              | 0.039   | N=419 <sup>c</sup>              | 0.028   |
| Not vaccinated                             | 69                 | 63 (91.3%)       |         | 59 (88.1%)                    |         | 35 (57.4%)                    |         | 35 (57.4%)                      |         | 4 (6.6%)                        |         |

|                    |     |             |            |            |            |            |
|--------------------|-----|-------------|------------|------------|------------|------------|
| 1 dose≤21 days     | 13  | 12 (92.3%)  | 10 (83.3%) | 6 (50.0%)  | 6 (50.0%)  | 1 (8.3%)   |
| 1 dose>21 days     | 72  | 59 (81.9%)  | 55 (79.9%) | 26 (39.4%) | 26 (39.4%) | 7 (10.6%)  |
| 2 doses≤7 days     | 11  | 10 (90.9%)  | 6 (54.5%)  | 4 (36.4%)  | 3 (27.3%)  | 1 (9.1%)   |
| 2 doses 8-90 days  | 73  | 64 (87.7%)  | 45 (62.5%) | 31 (44.9%) | 29 (42.0%) | 9 (13.0%)  |
| 2 doses>90 days    | 118 | 108 (91.5%) | 90 (78.3%) | 47 (42.0%) | 45 (40.2%) | 6 (5.4%)   |
| 3 doses≤7 days     | 15  | 8 (53.3%)   | 8 (53.3%)  | 1 (7.1%)   | 1 (7.1%)   | 5 (35.7%)  |
| 3 doses 8-151 days | 78  | 66 (84.6%)  | 53 (68.8%) | 31 (41.9%) | 29 (39.2%) | 11 (14.9%) |

<sup>a</sup> The numbers in the different categories might not add to 450, since some did not provide second or third nasal follow-up swabs. <sup>b</sup> 1 case did not have information on the date vaccination. <sup>c</sup> Supplementary table 4B provides information on the number of cases with missing data, according to the different variables/categories.

P values were obtained using the chi square test. ChAdOx1-S: the adenovirus vector vaccine (Oxford-AstraZeneca) COVID-19 vaccine, mRNA vaccine: either mRNA-1273 (Moderna, Inc.) or BNT162b2 (Pfizer-BioNTech) vaccines.

**Supplementary Table S5. C:** Number of index cases with missing follow-up nasal RT-PCR swabs.

|                                            | Overall | Number with missing nasal PCR swab 2 | Number with missing nasal PCR swab 3 |
|--------------------------------------------|---------|--------------------------------------|--------------------------------------|
| <b>Total</b>                               | 450     | 11                                   | 30                                   |
| <b>Age group</b>                           |         |                                      |                                      |
| 20-29                                      | 28      | 3                                    | 9                                    |
| 30-39                                      | 69      | 5                                    | 9                                    |
| 40-49                                      | 119     | 1                                    | 3                                    |
| 50-59                                      | 147     | 1                                    | 4                                    |
| 60-87                                      | 87      | 1                                    | 5                                    |
| <b>Sex</b>                                 |         |                                      |                                      |
| Male                                       | 176     | 6                                    | 11                                   |
| Female                                     | 274     | 5                                    | 16                                   |
| <b>Household size</b>                      |         |                                      |                                      |
| 2-3 individuals                            | 276     | 4                                    | 17                                   |
| 4-8 individuals                            | 173     | 7                                    | 13                                   |
| <b>Period</b>                              |         |                                      |                                      |
| Alpha (week 6-18, 2021)                    | 117     | 3                                    | 6                                    |
| Delta (weeks 19-48, 2021)                  | 259     | 5                                    | 17                                   |
| Omicron (weeks 49-52 2021/weeks 1-6, 2022) | 74      | 3                                    | 7                                    |
| <b>COVID-19 vaccination</b>                |         |                                      |                                      |
| Not vaccinated                             | 69      | 2                                    | 8                                    |
| 1 dose                                     | 85      | 4                                    | 7                                    |
| 2 doses                                    | 202     | 4                                    | 10                                   |
| 3 doses                                    | 94      | 1                                    | 5                                    |
| 1 dose ChAdOx1-S                           | 42      | 2                                    | 3                                    |
| 1 dose mRNA vaccine                        | 43      | 2                                    | 4                                    |
| 2 doses ChAdOx1-S                          | 141     | 0                                    | 4                                    |
| 2 doses mRNA vaccine                       | 61      | 4                                    | 6                                    |
| 3 doses mRNA vaccine                       | 49      | 1                                    | 3                                    |
| 3 doses (2 ChAdOx1-S booster mRNA)         | 45      | 0                                    | 2                                    |
| 1 doses≤21 days                            | 13      | 1                                    | 1                                    |
| 1 dose>21 days                             | 72      | 3                                    | 6                                    |
| 2 doses≤7 days                             | 11      | 0                                    | 0                                    |
| 2 doses 8-90 days                          | 73      | 1                                    | 4                                    |
| 2 doses>90 days                            | 118     | 3                                    | 6                                    |
| 3 doses≤7 days                             | 15      | 0                                    | 1                                    |
| 3 doses 8-151 days                         | 78      | 1                                    | 4                                    |

ChAdOx1-S: the adenovirus vector vaccine (Oxford-AstraZeneca) COVID-19 vaccine, mRNA vaccine: either mRNA-1273 (Moderna, Inc.) or BNT162b2 (Pfizer-BioNTech) vaccines.

**Supplementary Table S6. A:** SARS-CoV-2 PCR positivity in the follow-up nasal swabs among the household contacts aged 20 years or older by demographics and COVID-19 vaccination status <sup>a</sup>.

|                                                   | Overall | Nasal PCR swab 1 | P value | Nasal PCR swab 2 <sup>a</sup> | P value | Nasal PCR swab 3 <sup>a</sup> | P value | All nasal PCRs swabs positive <sup>a</sup> | P value | All nasal PCRs swabs negative <sup>a</sup> | P value |
|---------------------------------------------------|---------|------------------|---------|-------------------------------|---------|-------------------------------|---------|--------------------------------------------|---------|--------------------------------------------|---------|
| <b>Overall number of swabs at each time point</b> | N=472   | N=472            |         | N=458                         |         | N=430                         |         | N=430                                      |         | N=430                                      |         |
| <b>Age group</b>                                  |         |                  | 0.010   |                               | 0.007   |                               | 0.006   |                                            | 0.005   |                                            | 0.002   |
| 20-29                                             | 71      | 21 (29.6%)       |         | 21 (31.3%)                    |         | 10 (17.2%)                    |         | 6 (10.3%)                                  |         | 38 (65.5%)                                 |         |
| 30-39                                             | 71      | 39 (54.5%)       |         | 37 (56.1%)                    |         | 27 (42.2%)                    |         | 23 (35.9%)                                 |         | 25 (39.1%)                                 |         |
| 40-49                                             | 104     | 55 (52.9%)       |         | 47 (46.1%)                    |         | 33 (34.5%)                    |         | 30 (31.6%)                                 |         | 41 (43.2%)                                 |         |
| 50-59                                             | 133     | 54 (40.6%)       |         | 46 (34.8%)                    |         | 32 (23.6%)                    |         | 26 (20.5%)                                 |         | 70 (55.1%)                                 |         |
| 60-87                                             | 93      | 48 (51.6%)       |         | 45 (49.5%)                    |         | 32 (37.2%)                    |         | 30 (34.9%)                                 |         | 38 (44.2%)                                 |         |
| <b>Sex</b>                                        |         |                  | 0.972   |                               | 0.452   |                               | 0.924   |                                            | 0.996   |                                            | 0.671   |
| Male                                              | 254     | 117 (46.1%)      |         | 102 (41.3%)                   |         | 71 (30.7%)                    |         | 62 (26.8%)                                 |         | 115 (49.8%)                                |         |
| Female                                            | 218     | 100 (45.9%)      |         | 94 (44.5%)                    |         | 61 (30.7%)                    |         | 53 (26.6%)                                 |         | 97 (48.7%)                                 |         |
| <b>Household size</b>                             |         |                  | 0.251   |                               | 0.392   |                               | 0.997   |                                            | 0.516   |                                            | 0.106   |
| 2-3 individuals                                   | 285     | 137 (48.1%)      |         | 124 (44.3%)                   |         | 80 (30.4%)                    |         | 73 (27.8%)                                 |         | 122 (48.4%)                                |         |
| 4-8 individuals                                   | 186     | 79 (42.5%)       |         | 71 (40.1%)                    |         | 51 (30.7%)                    |         | 41 (24.7%)                                 |         | 90 (54.2%)                                 |         |
| <b>Period</b>                                     |         |                  | 0.135   |                               | 0.818   |                               | 0.572   |                                            | 0.990   |                                            | 0.401   |
| Alpha (weeks 6-18, 2021)                          | 127     | 50 (39.4%)       |         | 48 (40.0%)                    |         | 39 (34.2%)                    |         | 30 (26.3%)                                 |         | 59 (51.8%)                                 |         |
| Delta (weeks 19-48, 2021)                         | 270     | 126 (46.7%)      |         | 116 (43.8%)                   |         | 72 (29.3%)                    |         | 66 (26.8%)                                 |         | 123 (50.0%)                                |         |
| Omicron (weeks 49-52 2021/ weeks 1-6, 2022)       | 75      | 41 (54.7%)       |         | 32 (43.8%)                    |         | 21 (30.0%)                    |         | 19 (27.1%)                                 |         | 30 (42.9%)                                 |         |
| <b>COVID-19 vaccination</b>                       |         |                  | 0.511   |                               | 0.050   |                               | 0.258   |                                            | 0.531   |                                            | 0.291   |
| Not vaccinated                                    | 93      | 47 (50.5%)       |         | 45 (51.1%)                    |         | 29 (36.3%)                    |         | 24 (30.0%)                                 |         | 34 (42.5%)                                 |         |
| 1 dose                                            | 82      | 34 (41.5%)       |         | 29 (36.7%)                    |         | 22 (30.6%)                    |         | 19 (26.4%)                                 |         | 37 (51.4%)                                 |         |
| 2 doses                                           | 217     | 103 (47.5%)      |         | 97 (46.0%)                    |         | 65 (32.0%)                    |         | 57 (28.1%)                                 |         | 98 (48.3%)                                 |         |
| 3 doses                                           | 80      | 33 (41.3%)       |         | 25 (31.6%)                    |         | 16 (21.3%)                    |         | 15 (20.0%)                                 |         | 43 (57.3%)                                 |         |
| <b>COVID-19 vaccination x Brand</b>               |         |                  | 0.099   |                               | 0.034   |                               | 0.023   |                                            | 0.057   |                                            | 0.017   |
| Not vaccinated                                    | 93      | 47 (50.5%)       |         | 45 (51.1%)                    |         | 29 (36.3%)                    |         | 24 (30.0%)                                 |         | 34 (42.5%)                                 |         |
| 1 dose ChAdOx1-S                                  | 49      | 25 (51.0%)       |         | 21 (43.8%)                    |         | 18 (40.9%)                    |         | 16 (36.4%)                                 |         | 19 (43.2%)                                 |         |
| 1 dose mRNA vaccine                               | 33      | 9 (27.3%)        |         | 8 (25.8%)                     |         | 4 (14.3%)                     |         | 3 (10.7%)                                  |         | 18 (64.3%)                                 |         |
| 2 doses ChAdOx1-S                                 | 137     | 73 (53.3%)       |         | 69 (50.7%)                    |         | 50 (38.5%)                    |         | 44 (33.8%)                                 |         | 54 (41.5%)                                 |         |
| 2 doses mRNA vaccine                              | 80      | 30 (37.5%)       |         | 28 (36.8%)                    |         | 15 (20.5%)                    |         | 13 (17.8%)                                 |         | 44 (60.3%)                                 |         |
| 3 doses mRNA vaccine                              | 45      | 17 (37.8%)       |         | 12 (27.3%)                    |         | 10 (23.3%)                    |         | 9 (20.9%)                                  |         | 27 (62.8%)                                 |         |
| 3 doses (2 ChAdOx1-S, booster mRNA)               | 33      | 15 (45.5%)       |         | 12 (36.4%)                    |         | 6 (20.0%)                     |         | 6 (20.0%)                                  |         | 15 (50.0%)                                 |         |
| <b>COVID-19 vaccination x time</b>                |         |                  | <0.001  |                               | 0.009   |                               | 0.051   |                                            | 0.043   |                                            | 0.004   |
| Not vaccinated                                    | 93      | 47 (50.5%)       |         | 45 (51.1%)                    |         | 29 (36.3%)                    |         | 24 (30.0%)                                 |         | 34 (42.5%)                                 |         |

|                    |     |            |            |            |            |            |
|--------------------|-----|------------|------------|------------|------------|------------|
| 1 doses≤21 days    | 12  | 9 (75.0%)  | 6 (50.0%)  | 6 (54.5%)  | 5 (45.5%)  | 2 (18.2%)  |
| 1 dose>21 days     | 69  | 25 (36.2%) | 23 (34.8%) | 16 (26.2%) | 14 (23.0%) | 35 (57.4%) |
| 2 doses≤7 days     | 3   | 3 (100.0%) | 2 (66.7%)  | 3 (33.3%)  | 3 (33.3%)  | 0 (0.0%)   |
| 2 doses 8-90 days  | 74  | 23 (31.1%) | 25 (34.2%) | 16 (22.5%) | 11 (15.5%) | 45 (63.4%) |
| 2 doses>90 days    | 140 | 77 (55.0%) | 70 (51.5%) | 48 (37.2%) | 45 (34.9%) | 53 (41.1%) |
| 3 doses≤7 days     | 4   | 4 (100.0%) | 3 (75.0%)  | 2 (50.0%)  | 2 (50.0%)  | 0 (0.0%)   |
| 3 doses 8-151 days | 76  | 29 (38.2%) | 22 (29.3%) | 14 (19.7%) | 13 (18.3%) | 43 (60.6%) |

<sup>a</sup> The numbers in the different categories might not add to 472, since some did not provide second or third nasal follow-up swabs. Supplementary table 5B provides information on the number of index cases with missing data, according to the different variables/categories P values were obtained using bivariate Generalized Estimating Equations using negative binomial models yielding relative risk (RR), 95% confidence intervals (CI) and P values. ChAdOx1-S: the adenovirus vector vaccine (Oxford-AstraZeneca) COVID-19 vaccine, mRNA vaccine: either mRNA-1273 (Moderna, Inc.) or BNT162b2 (Pfizer-BioNTech) vaccines.

**Supplementary Table S6. B:** Number of household contacts aged 20 years or older with missing follow-up nasal PCR swabs.

|                                             | Overall | Number with<br>missing nasal PCR<br>swab 2 | Number with<br>missing nasal PCR<br>swab 3 |
|---------------------------------------------|---------|--------------------------------------------|--------------------------------------------|
| Total                                       | N=472   | 14                                         | 42                                         |
| Age group                                   |         |                                            |                                            |
| 20-29                                       | 71      | 4                                          | 13                                         |
| 30-39                                       | 71      | 5                                          | 7                                          |
| 40-49                                       | 104     | 2                                          | 9                                          |
| 50-59                                       | 133     | 1                                          | 6                                          |
| 60-87                                       | 93      | 2                                          | 7                                          |
| Sex                                         |         |                                            |                                            |
| Male                                        | 254     | 7                                          | 23                                         |
| Female                                      | 218     | 7                                          | 19                                         |
| Household size                              |         |                                            |                                            |
| 2-3 individuals                             | 285     | 5                                          | 12                                         |
| 4-8 individuals                             | 196     | 9                                          | 30                                         |
| Period                                      |         |                                            |                                            |
| Alpha (weeks 6-18, 2021)                    | 127     | 7                                          | 13                                         |
| Delta (weeks 19-48, 2021)                   | 270     | 5                                          | 24                                         |
| Omicron (weeks 49-52 2021/ weeks 1-6, 2022) | 75      | 2                                          | 5                                          |
| COVID-19 vaccination                        |         |                                            |                                            |
| Not vaccinated                              | 93      | 5                                          | 13                                         |
| 1 dose                                      | 82      | 3                                          | 10                                         |
| 2 doses                                     | 217     | 5                                          | 14                                         |
| 3 doses                                     | 80      | 1                                          | 5                                          |
| 1 dose ChAdOx1-S                            | 49      | 1                                          | 5                                          |
| 1 dose mRNA vaccine                         | 33      | 2                                          | 5                                          |
| 2 doses ChAdOx1-S                           | 137     | 1                                          | 7                                          |
| 2 doses mRNA vaccine                        | 80      | 4                                          | 7                                          |
| 3 doses mRNA vaccine                        | 45      | 1                                          | 2                                          |
| 3 doses (2 ChAdOx1-S booster mRNA)          | 33      | 0                                          | 3                                          |
| 1 doses≤21 days                             | 12      | 0                                          | 1                                          |
| 1 dose>21 days                              | 69      | 3                                          | 8                                          |
| 2 doses≤7 days                              | 3       | 0                                          | 0                                          |
| 2 doses 8-90 days                           | 74      | 1                                          | 3                                          |
| 2 doses>90 days                             | 140     | 4                                          | 11                                         |
| 3 doses≤7 days                              | 4       | 0                                          | 0                                          |
| 3 doses 8-151 days                          | 76      | 1                                          | 5                                          |

ChAdOx1-S: the adenovirus vector vaccine (Oxford-AstraZeneca) COVID-19 vaccine, mRNA vaccine: either mRNA-1273 (Moderna, Inc.) or BNT162b2 (Pfizer-BioNTech) vaccines.

**Supplementary Table S7:** COVID-19 (symptomatic SARS-CoV-2 infection) among household contacts aged 20 years or older by demographics and COVID-19 vaccination status – a sensitivity analysis.

|                                                                 | Overall | COVID-19    | Unadjusted RR<br>(95% CI) <sup>a</sup> | P value | Adjusted RR<br>(95% CI) <sup>a</sup> | P value |
|-----------------------------------------------------------------|---------|-------------|----------------------------------------|---------|--------------------------------------|---------|
| <b>Age group</b>                                                |         |             |                                        | 0.014   |                                      | 0.005   |
| 20-29                                                           | 69      | 25 (36.2%)  | 1.00                                   |         | 1.00                                 |         |
| 30-39                                                           | 69      | 42 (60.9%)  | 1.79 (1.21-2.64)                       | 0.004   | 1.86 (1.28-2.69)                     | 0.001   |
| 40-49                                                           | 102     | 56 (54.9%)  | 1.62 (1.10-2.38)                       | 0.013   | 1.85 (1.28-2.66)                     | 0.001   |
| 50-59                                                           | 130     | 56 (43.1%)  | 1.27 (0.85-1.88)                       | 0.238   | 1.42 (0.98-2.07)                     | 0.063   |
| 60-87                                                           | 93      | 50 (53.8%)  | 1.61 (1.09-2.38)                       | 0.016   | 1.70 (1.16-2.50)                     | 0.007   |
| <b>Sex</b>                                                      |         |             |                                        | 0.941   |                                      | 0.860   |
| Male                                                            | 249     | 123 (49.4%) | 1.00                                   |         | 1.00                                 |         |
| Female                                                          | 214     | 106 (49.5%) | 1.00 (0.83-1.21)                       |         | 1.01 (0.84-1.22)                     |         |
| <b>Household size</b>                                           |         |             |                                        | 0.261   |                                      | 0.070   |
| 2-3 individuals                                                 | 279     | 143 (51.3%) | 1.00                                   |         | 1.00                                 |         |
| 4-8 individuals                                                 | 183     | 85 (46.4%)  | 0.89 (0.73-1.08)                       |         | 0.82 (0.66-1.01)                     |         |
| <b>Variant Period</b>                                           |         |             |                                        | 0.411   |                                      | <0.001  |
| Alpha (weeks 6-18, 2021)                                        | 123     | 56 (45.5%)  | 1.00                                   |         | 1.00                                 |         |
| Delta (weeks 19-48, 2021)                                       | 267     | 132 (49.4%) | 1.06 (0.84-1.34)                       | 0.613   | 1.45 (1.10-1.93)                     | 0.008   |
| Omicron (weeks 49-52 2021 & 1-6, 2022)                          | 73      | 41 (56.2%)  | 1.21 (0.90-1.61)                       | 0.193   | 2.16 (1.50-3.10)                     | <0.001  |
| <b>COVID-19 vaccination of the contact</b>                      |         |             |                                        | 0.087   |                                      | <0.001  |
| Not vaccinated                                                  | 91      | 53 (58.2%)  | 1.00                                   |         | 1.00                                 |         |
| 1 dose                                                          | 81      | 37 (45.7%)  | 0.78 (0.58-1.08)                       | 0.106   | 0.81 (0.59-1.11)                     | 0.196   |
| 2 doses                                                         | 214     | 109 (50.9%) | 0.87 (0.70-1.08)                       | 0.214   | 0.63 (0.48-0.82)                     | 0.001   |
| 3 doses                                                         | 77      | 30 (39.0%)  | 0.66 (0.48-0.93)                       | 0.017   | 0.36 (0.24-0.53)                     | <0.001  |
| <b>The household contacts' COVID-19 vaccination<br/>x Brand</b> |         |             |                                        | 0.026   |                                      | <0.001  |
| Not vaccinated                                                  | 91      | 53 (58.2%)  | 1.00                                   |         | 1.00                                 |         |
| 1 dose ChAdOx1-S                                                | 48      | 26 (54.2%)  | 0.93 (0.68-1.27)                       | 0.650   | 1.00 (0.71-1.41)                     | 0.990   |
| 1 dose mRNA vaccine                                             | 33      | 11 (33.3%)  | 0.57 (0.34-0.95)                       | 0.033   | 0.60 (0.35-1.00)                     | 0.053   |
| 2 doses ChAdOx1-S                                               | 135     | 77 (57.0%)  | 0.97 (0.77-1.22)                       | 0.820   | 0.72 (0.54-0.95)                     | 0.025   |
| 2 doses mRNA vaccine                                            | 79      | 32 (40.5%)  | 0.69 (0.50-0.95)                       | 0.026   | 0.53 (0.37-0.75)                     | <0.001  |
| 3 doses mRNA vaccine                                            | 42      | 14 (33.3%)  | 0.57 (0.36-0.90)                       | 0.018   | 0.31 (0.19-0.50)                     | <0.001  |
| 3 doses (2 ChAdOx1-S booster mRNA)                              | 33      | 15 (45.5%)  | 0.78 (0.51-1.17)                       | 0.239   | 0.44 (0.28-0.69)                     | <0.001  |
| <b>The household contacts' COVID-19 vaccination<br/>x time</b>  |         |             |                                        | <0.001  |                                      | <0.001  |
| Not vaccinated, vaccinated 1 dose≤21 days                       | 102     | 62 (60.8%)  | 1.00                                   |         | 1.00                                 |         |
| Vaccinated 1 dose>21 days or 2 doses≤7 days                     | 72      | 31 (43.1%)  | 0.70 (0.52-0.96)                       | 0.028   | 0.73 (0.53-1.02)                     | 0.066   |
| Vaccinated 2 doses 8-90 days                                    | 73      | 27 (37.0%)  | 0.60 (0.43-0.85)                       | 0.004   | 0.47 (0.33-0.68)                     | <0.001  |
| Vaccinated 2 doses>90 days or 3 doses≤7 days                    | 142     | 83 (58.5%)  | 0.95 (0.77-1.16)                       | 0.679   | 0.66 (0.51-0.86)                     | 0.002   |
| Vaccinated 3 doses 8-151 days                                   | 73      | 26 (35.6%)  | 0.58 (0.41-0.82)                       | 0.002   | 0.30 (0.20-0.45)                     | <0.001  |

<sup>a</sup> Generalized Estimating Equations using negative binomial models, yielding relative risk (RR), 95% confidence intervals (CI) and P values..

COVID-19: RT-PCR confirmed SARS-CoV-2 infection in at least one follow-up nasal swab plus symptoms (at least one), 9 individuals with asymptomatic infection were excluded from the analysis. The results of the covariates relate to model of in which COVID-19 vaccination status of was introduced as the number of doses. The results for the covariates in the remaining models that related to 'vaccine brand' and number of doses by time elapsed since vaccination' were similar and thus not presented

ChAdOx1-S: the adenovirus vector vaccine (Oxford-AstraZeneca) COVID-19 vaccine, mRNA vaccine: either mRNA-1273 (Moderna, Inc.) or BNT162b2 (Pfizer-BioNTech) vaccines.

**Supplementary Table S8.** The associations of COVID-19 vaccination with overall SARS-CoV-2 infection and COVID-19 among household contacts aged 20 years or older- sensitivity analyses.

|                                                             | Overall infection <sup>a,b</sup>     |         | COVID-19 <sup>b,c</sup>           |         |
|-------------------------------------------------------------|--------------------------------------|---------|-----------------------------------|---------|
|                                                             | Adjusted RR (95% CI)<br><sup>e</sup> | P value | Adjusted RR (95% CI) <sup>e</sup> | P value |
| <b>COVID-19 vaccination of the household contact</b>        |                                      | <0.001  |                                   | <0.001  |
| Not vaccinated                                              | 1.00                                 |         | 1.00                              |         |
| 1 dose                                                      | 0.80 (0.57-1.10)                     | 0.174   | 0.80 (0.57-1.12)                  | 0.197   |
| 2 doses                                                     | 0.62 (0.46-0.84)                     | 0.002   | 0.61 (0.45-0.83)                  | 0.002   |
| 3 doses                                                     | 0.33 (0.22-0.50)                     | <0.001  | 0.30 (0.20-0.45)                  | <0.001  |
| <b>The household contacts' COVID-19 vaccination x Brand</b> |                                      | <0.001  |                                   | <0.001  |
| Not vaccinated                                              | 1.00                                 |         | 1.00                              |         |
| 1 dose ChAdOx1-S                                            | 0.97 (0.66-1.43)                     | 0.902   | 0.97 (0.65-1.45)                  | 0.894   |
| 1 dose mRNA vaccine                                         | 0.61 (0.37-1.02)                     | 0.061   | 0.63 (0.37-1.05)                  | 0.080   |
| 2 doses ChAdOx1-S                                           | 0.72 (0.52-1.00)                     | 0.050   | 0.71 (0.51-0.99)                  | 0.046   |
| 2 doses mRNA vaccine                                        | 0.54 (0.38-0.77)                     | 0.001   | 0.53 (0.37-0.76)                  | 0.001   |
| 3 doses mRNA vaccine                                        | 0.31 (0.19-0.50)                     | <0.001  | 0.25 (0.15-0.43)                  | <0.001  |
| 3 doses (2 ChAdOx1-S booster mRNA)                          | 0.38 (0.23-0.61)                     | <0.001  | 0.36 (0.22-0.59)                  | <0.001  |
| <b>The household contacts' COVID-19 vaccination x time</b>  |                                      | <0.001  |                                   | <0.001  |
| Not vaccinated, vaccinated 1 dose≤21 days                   | 1.00                                 |         | 1.00                              |         |
| Vaccinated 1 dose>21 days or 2 doses≤7 days                 | 0.69 (0.49-0.96)                     | 0.028   | 0.71 (0.51-1.00)                  | 0.055   |
| Vaccinated 2 doses 8-90 days                                | 0.48 (0.33-0.72)                     | <0.001  | 0.48 (0.32-0.71)                  | <0.001  |
| Vaccinated 2 doses>90 days or 3 doses≤7 days                | 0.71 (0.51-0.98)                     | 0.041   | 0.70 (0.50-0.98)                  | 0.041   |
| Vaccinated 3 doses 8-151 days                               | 0.29 (0.19-0.45)                     | <0.001  | 0.25 (0.16-0.39)                  | <0.001  |

<sup>a</sup> Overall infection: RT-PCR confirmed SARS-CoV-2 infection in at least one follow-up nasal swab. <sup>b</sup> The model included calendar month-year to adjust for variant/period <sup>c</sup> COVID-19: RT-PCR confirmed SARS-CoV-2 infection in at least one follow-up nasal swab plus symptoms (at least one); asymptomatic individuals were excluded from the analysis <sup>d</sup> Generalized Estimating Equations using negative binomial models yielding relative risk (RR), 95% confidence intervals (CI) and P values: each model included age, sex, household size, vaccination status, and time variable (calendar month-year) as independent variables. ChAdOx1-S: the adenovirus vector vaccine (Oxford-AstraZeneca) COVID-19 vaccine, mRNA vaccine: either mRNA-1273 (Moderna, Inc.) or BNT162b2 (Pfizer-BioNTech) vaccines

**Supplementary Table S9.** COVID-19 vaccination status of household contacts aged 20 years or older by variant period.

|                    | <b>Alpha</b>     | <b>Delta</b>      | <b>Omicron</b>               |
|--------------------|------------------|-------------------|------------------------------|
|                    | Weeks 6-18, 2021 | Weeks 19-48, 2021 | Weeks 49-52 2021 & 1-6, 2022 |
| Total              | 126 (100.0%)     | 270 (100.0%)      | 75 (100.0%)                  |
| Not vaccinated     | 57 (45.2%)       | 29 (10.7%)        | 7 (9.3%)                     |
| 1 dose≤21 days     | 9 (7.1%)         | 3 (1.1%)          | 0 (0.0%)                     |
| 1 dose>21 days     | 51 (40.5%)       | 18 (6.7%)         | 0 (0.0%)                     |
| 2 doses≤7 days     | 1 (0.8%)         | 2 (0.7%)          | 0 (0.0%)                     |
| 2 doses 8-90 days  | 8 (6.3%)         | 65 (24.1%)        | 1 (1.3%)                     |
| 2 doses>90 days    | 0 (0.0%)         | 121 (44.8%)       | 19 (25.3%)                   |
| 3 doses≤7 days     | 0 (0.0%)         | 3 (1.1%)          | 1 (1.3%)                     |
| 3 doses 8-151 days | 0 (0.0%)         | 29 (10.7%)        | 47 (62.7%)                   |

**Supplementary Table S10.** The associations of COVID-19 vaccination with overall SARS-CoV-2 infection among household contacts aged 20 years or older during the Alpha variant period (N=126) -a sensitivity analysis <sup>a</sup>.

| The contact's vaccination status            | n/Total (%)      | Unadjusted RR (95% CI) <sup>b</sup> | P value | Adjusted RR (95% CI) <sup>c</sup> | P value |
|---------------------------------------------|------------------|-------------------------------------|---------|-----------------------------------|---------|
| <b>COVID-19 vaccination</b>                 |                  |                                     | 0.015   |                                   | 0.025   |
| Not vaccinated                              | 34/57<br>(59.6%) | 1.00                                |         | 1.00                              |         |
| 1-2 doses                                   | 26/70<br>(37.1%) | 0.63 (0.43-0.91)                    |         | 0.59 (0.37-0.93)                  |         |
| <b>COVID-19 vaccination x time</b>          |                  |                                     | 0.007   |                                   | 0.001   |
| Not vaccinated, vaccinated 1 dose≤21 days   | 41/66<br>(62.1%) | 1.00                                |         | 1.00                              |         |
| Vaccinated 1 dose>21 days or 2 doses≤7 days | 17/52<br>(32.7%) | 0.52 (0.34-0.81)                    | 0.004   | 0.44 (0.27-0.73)                  | 0.001   |
| Vaccinated 2 doses 8-90 days                | 2/8 (25.0%)      | 0.40 (0.11-1.35)                    | 0.142   | 0.28 (0.08-0.99)                  | 0.048   |

<sup>a</sup> Overall infection: RT-PCR confirmed SARS-CoV-2 infection in at least one follow-up nasal swab <sup>b</sup> Bivariate Generalized Estimating Equations using negative binomial models, yielding relative risk (RR), 95% confidence intervals (CI) and P values <sup>c</sup>Generalized Estimating Equations using negative binomial models: each model included in addition to the contact's vaccination status the following independent variables: age, sex, household size, and time-variable as calendar month/year to adjust for variant/period.

**Supplementary Table S11.** The associations of COVID-19 vaccination with overall SARS-CoV-2 infection among household contacts aged 20 years or older during the Delta variant period (N=270) <sup>a</sup>.

| The contact's vaccination status                | n/Total (%)       | Unadjusted RR<br>(95% CI) <sup>b</sup> | P value | Adjusted RR<br>(95% CI) <sup>c</sup> | P value |
|-------------------------------------------------|-------------------|----------------------------------------|---------|--------------------------------------|---------|
| <b>COVID-19 vaccination</b>                     |                   |                                        | 0.004   |                                      | <0.001  |
| Not vaccinated                                  | 17/29<br>(58.6%)  | 1.00                                   |         | 1.00                                 |         |
| 1 dose                                          | 15/21<br>(71.4%)  | 1.21 (0.81-<br>1.83)                   | 0.343   | 1.12 (0.68-<br>1.86)                 |         |
| 2 doses                                         | 97/187<br>(51.9%) | 0.88 (0.62-<br>1.23)                   | 0.458   | 0.56 (0.36-<br>0.87)                 | 0.011   |
| 3 doses                                         | 6/33 (18.2%)      | 0.31 (0.14-<br>0.68)                   | 0.003   | 0.17 (0.07-<br>0.40)                 | <0.001  |
| <b>COVID-19 vaccination x time</b>              |                   |                                        | <0.001  |                                      | 0.001   |
| Not vaccinated or vaccinated 1<br>dose≤21 days  | 20/32<br>(62.5%)  | 1.00                                   |         | 1.00                                 |         |
| Vaccinated 1 dose>21 days or 2<br>doses≤7 days  | 14/20<br>(70.0%)  | 1.12 (0.75-<br>1.65)                   | 0.572   | 1.06 (0.67-<br>1.69)                 | 0.789   |
| Vaccinated 2 doses 8-90 days                    | 26/65<br>(40.0%)  | 0.64 (0.42-<br>0.95)                   | 0.029   | 0.50 (0.31-<br>0.87)                 | 0.005   |
| Vaccinated 2 doses>90 days or 3<br>doses≤7 days | 72/124<br>(58.1%) | 0.92 (0.67-<br>1.25)                   | 0.613   | 0.56 (0.36-<br>0.87)                 | 0.011   |
| Vaccinated 3 doses≥8 days                       | 3/29 (10.3%)      | 0.16 (0.05-<br>0.50)                   | 0.001   | 0.10 (0.03-<br>0.32)                 | <0.001  |

<sup>a</sup> Overall infection: RT-PCR confirmed SARS-CoV-2 infection in at least one follow-up nasal swab <sup>b</sup> Bivariate Generalized Estimating Equations using negative binomial models, yielding relative risk (RR), 95% confidence intervals (CI) and P values. <sup>c</sup> Generalized Estimating Equations using negative binomial models: each model included age, sex, household size, vaccination status, and time-variable calendar month to adjust for variant/period as independent variables.

**Supplementary Table S12.** The associations of COVID-19 vaccination with overall SARS-CoV-2 infection among household contacts aged 20 years or older during the Omicron variant period (N=75) <sup>a</sup>.

| The contact's vaccination status                                   | n/Total (%)   | Unadjusted RR<br>(95% CI) <sup>b</sup> | P value | Adjusted RR<br>(95% CI) <sup>c</sup> | P value |
|--------------------------------------------------------------------|---------------|----------------------------------------|---------|--------------------------------------|---------|
| <b>COVID-19 vaccination of the contact</b>                         |               |                                        | 0.643   |                                      | 0.048   |
| Not vaccinated, vaccinated 2 doses or 3 doses ≤7 days <sup>d</sup> | 17/28 (60.7%) | 1.00                                   |         | 1.00                                 |         |
| 3 doses 8-151 days                                                 | 26/47 (55.3%) | 0.91 (0.61-1.35)                       |         | 0.65 (0.42-0.99)                     |         |

<sup>a</sup> Overall infection: RT-PCR confirmed SARS-CoV-2 infection in at least one follow-up nasal swab. <sup>b</sup> Bivariate Generalized Estimating Equations using negative binomial models, yielding relative risk (RR), 95% confidence intervals (CI), and P values. <sup>c</sup> Generalized Estimating Equations using a negative binomial model, which included the independent variables: age, sex, household size, the contact's vaccination status, and time-variable calendar month/year to adjust for variant/period as independent variables. <sup>d</sup> Unvaccinated participants, those who were vaccinated with two doses (regardless of time elapsed since vaccination) or three doses ≤seven days, were grouped into one category.

**Supplementary Table S13.** The correlation between the number of COVID-19 vaccination received by the index cases and their household contacts.

|                                                                 |   | Number of COVID-19 vaccines doses<br>received by the contact |    |     |    | Total | Spearman's<br>correlation<br>coefficient | P value |
|-----------------------------------------------------------------|---|--------------------------------------------------------------|----|-----|----|-------|------------------------------------------|---------|
|                                                                 |   | 0                                                            | 1  | 2   | 3  |       |                                          |         |
| Number of COVID-19 vaccines doses<br>received by the index case | 0 | 42                                                           | 11 | 16  | 2  | 71    | 0.72                                     | <0.001  |
|                                                                 | 1 | 35                                                           | 48 | 9   | 0  | 92    |                                          |         |
|                                                                 | 2 | 15                                                           | 23 | 161 | 15 | 214   |                                          |         |
|                                                                 | 3 | 1                                                            | 0  | 31  | 63 | 95    |                                          |         |
| Total                                                           |   | 93                                                           | 82 | 217 | 80 | 472   |                                          |         |

**Supplementary Table S14.** The association of COVID-19 vaccination and Ct values of the E gene of SARS-CoV-2 positive participants on their first positive swab – a pooled analysis of index cases and household contacts.

|                | Number | Ct values≤24.93<br>(median) | Ct value>24.93<br>(median) | Adjusted RR<br>(95% CI) <sup>a</sup> | P value |
|----------------|--------|-----------------------------|----------------------------|--------------------------------------|---------|
| Not vaccinated | 119    | 69 (58.0%)                  | 50 (42.0%)                 | 1.00                                 |         |
| 1 dose         | 112    | 66 (58.9%)                  | 46 (41.1%)                 | 0.98 (0.89-1.08)                     | 0.754   |
| 2 doses        | 297    | 152 (51.2%)                 | 145 (48.8%)                | 1.05 (0.97-1.15)                     | 0.201   |
| 3 doses        | 109    | 44 (40.4%)                  | 65 (59.6%)                 | 1.11 (1.00-1.24)                     | 0.038   |

<sup>a</sup> Generalized Estimating Equations using negative binomial models, yielding relative risk (RR), 95% confidence intervals (CI) and P values. The model included Ct values as the dependent variable, comparing high Ct values (above the median) to lower Ct values. The independent variable was vaccination status, the model adjusted for case/contact status and variant periods.
